# Supplementary material for: Effects of climate change on health system, policy response, and factors hindering policy formulation in Malawi: A qualitative study
Source: Research Square preprint supplement (doi:10.21203/rs.3.rs-8412962/v1), 2026-01-20
Supplement: Supplementary file 1 [file c46dc646401ae84c3b4b85a4.docx]

**KEY INFORMANT INTERVIEW QUESTIONS GUIDE FOR POLICYMAKERS.**

**Instruction: Please PROBE fully on each question before going to another one**

Dear.......................................,

My name is ......................... and I am pursuing my PhD degree in the Department of Public Health at the University of the Western Cape, South Africa. I would like to invite you to take part in my research project entitled Understanding the Health System’s preparedness and response to the effects of climate change extreme weather events in Malawi. A case study of Cyclone Freddy

Please take time to read the study information sheet provided to you carefully, and please feel free to ask questions if anything you read is not clear to you or if you’d like more information.

After reading the information sheet, do you have any questions about the study?

If you have further questions about this study in the future, you can contact [content blinded].

Do you consent to participate in this interview?

If the participant answers yes, **PLEASE** provide a consent to sign and move on to the questions

1. How can you describe climate change's effects on the health system in Malawi?

**PROBE ON** (i) the extent of the problem

(ii) areas/components of the health system affected most (**focus on service**

**Delivery, human resources, leadership, information, medicine, finance**

1. Which is the most noticeable climate change extreme weather events in Malawi?
2. How is the health system in the country responding to the effects of climate change?

**PROBE ON** (i) availability of policies, guideline and interventions

(ii) availability of trained health workers on climate change response

1. What factors are considered for a health problem to be included on a policy agenda?

**PROBE** (i) what else

(ii) if effects of climate change on health meets the mentioned factors

1. What factors are hindering formulation of climate change specific health policy?

**PROBE ON** (i) any other

1. What can be done for the health sector to formulate climate change-specific health policy?

**PROBE ON** (i) who can initiate

(ii) influencing factors

(iii) what are the current barriers

1. How can climate change-specific health policy be formulated?

**PROBE ON** (i) approaches to be followed

(ii) collaborative mechanism with other sectors/ level of consultations

1. What do you think will be the right thematic area for climate change health policy?

**DEMOGRAPHICS FOR STUDY PARTICIPANTS**

**RESPONDENT NO: .......................................**

**PLEASE TICK OR WRITE WHERE APPLICABLE**

**SEX**

| MALE | FEMALE |
| --- | --- |
|  |  |

**AGE**

|  |
| --- |

**MARITAL STATUS**

| MARRIED | SINGLE | SEPERATED | DIVORCED | OTHERS |
| --- | --- | --- | --- | --- |
|  |  |  |  | **.............................................................** |

**RELIGION**

| ROMAN CATHOLIC | CCAP | MUSLIM | SEVENTH DAY | OTHERS SPECIFY  ............................................... |
| --- | --- | --- | --- | --- |
|  |  |  |  |  |

**HIGHEST QUALIFICATION HELD**

| DIPLOMA | BACHELORS | MASTERS | PhD |
| --- | --- | --- | --- |
|  |  |  |  |

**CURRENT POSITION HELD**

|  |
| --- |

**NUMBER OF YEARS AT CURRENT POSITION**

|  |
| --- |

**THANK THE RESPONDENT AND CLOSE THE INTERVIEW**
